# Supplementary material for: A dual-time-window protocol to reduce acquisition time of dynamic tau PET imaging using [18F]MK-6240
Source: PubMed Central journal article supplement (PMC8160074; doi:10.1186/s13550-021-00790-x), 2021-05-27

# DVR Correlation

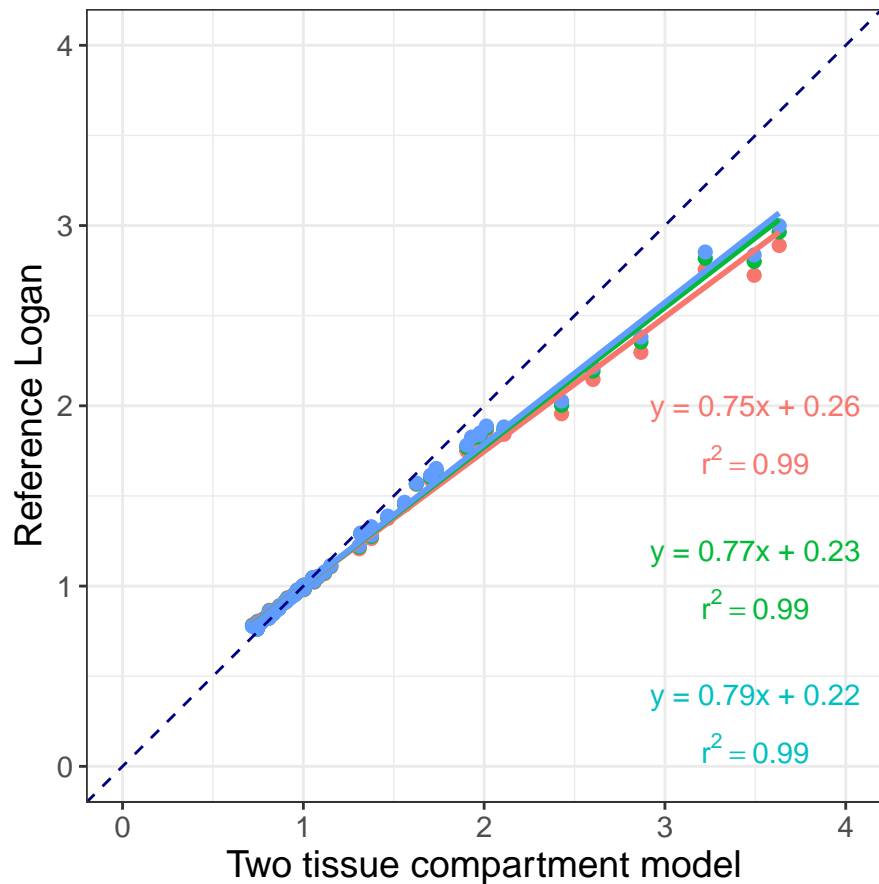

Supplement: 13550_2021_790_MOESM1_ESM.pdf [file 13550_2021_790_MOESM1_ESM.pdf]
