# Supplementary material for: A dual-time-window protocol to reduce acquisition time of dynamic tau PET imaging using [18F]MK-6240
Source: Springer Nature journal article supplement (doi:10.1186/s13550-021-00790-x), 2021-05-27

# Comparing quantification with different models

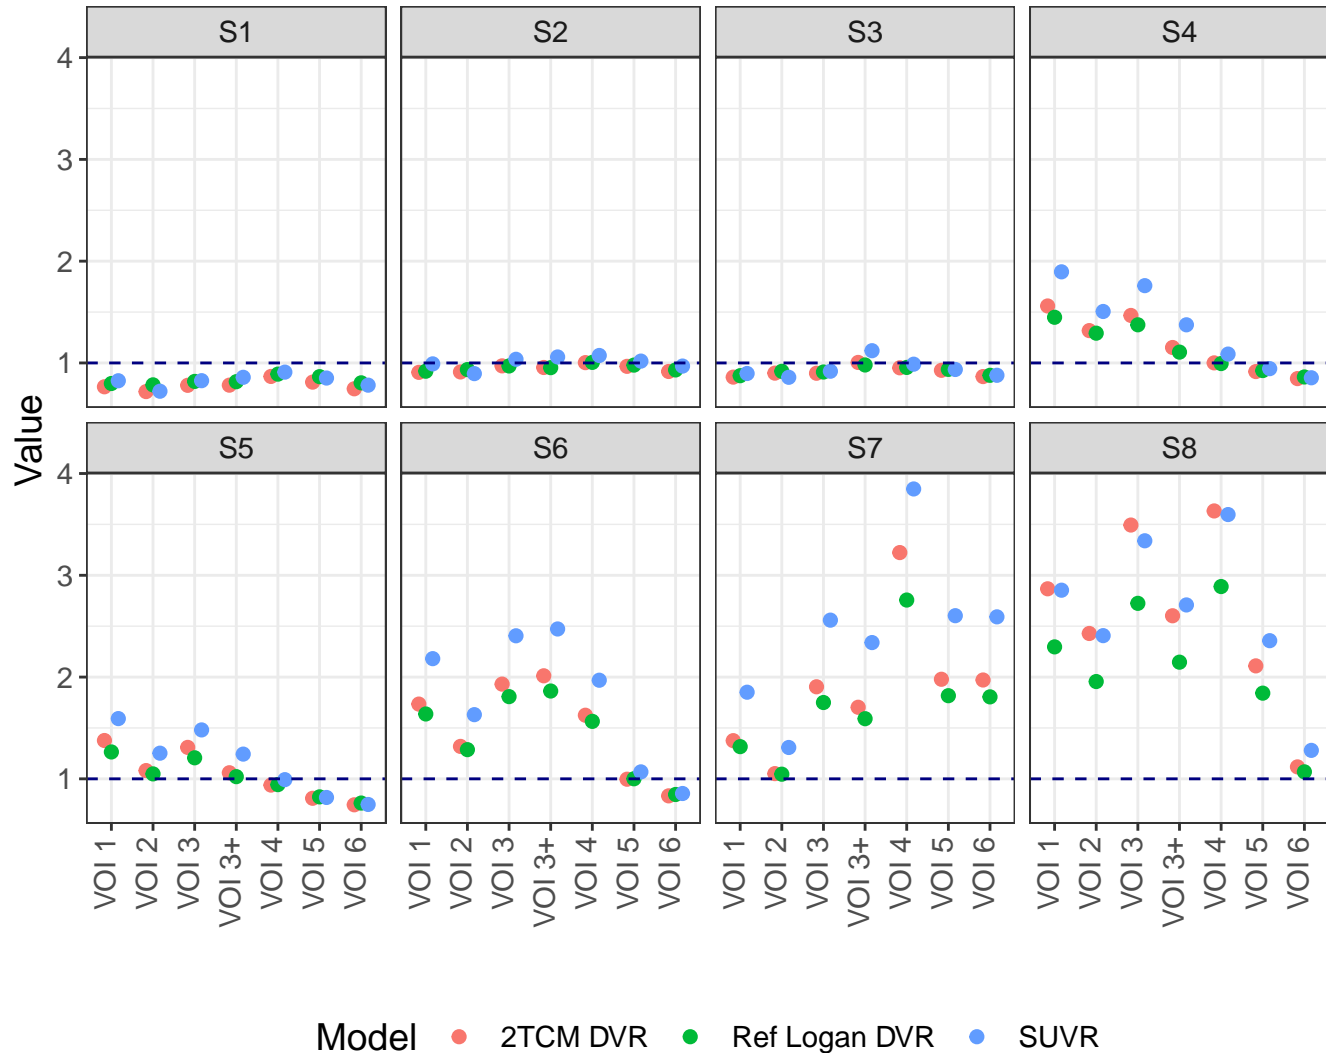

Supplement: MOESM3 [file 19203464]
